# Supplementary material
Source: PubMed Central journal article supplement (PMC4391549)
Supplement: 085b12156bba01fbedd40e1c4ff3a9f9_genetics.115.175166-1.pdf [file 085b12156bba01fbedd40e1c4ff3a9f9_genetics.115.175166-1.pdf]

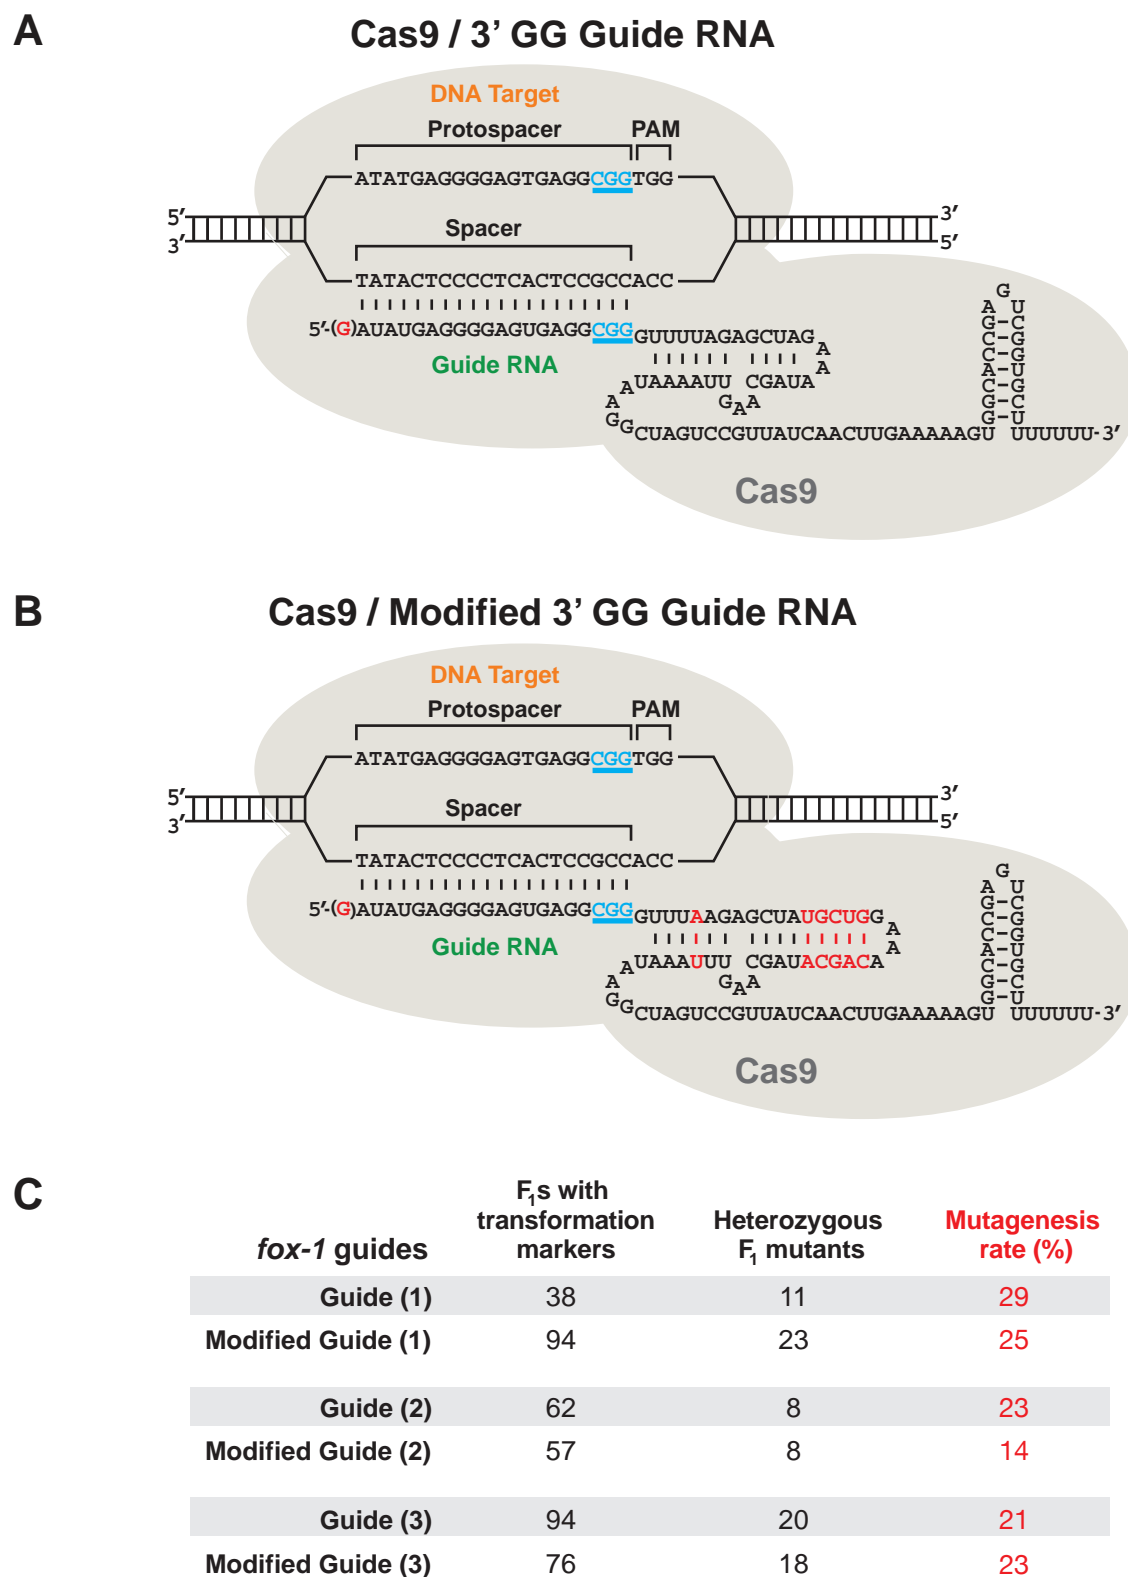

**Figure S1** Alternate guide RNA design with more extensive stem-loop structures does not enhance the Cas9 mutagenesis frequency achieved by 3' GG guide RNAs. (A-B) Shown are diagrams of two related guide RNAs bound in a complex with Cas9 to the same DNA target site. The 3' GG guide RNAs target Cas9 to sites with an NGG motif at the 3' end of the protospacer. The modified guide has the same target specificity as the 3' GG guide, but has a longer stem-loop structure, and an A-U flip that improved its efficacy in mammalian cell Cas9 experiments (Chen *et al.* 2013). (C) The addition of the longer stem-loop structure to three different 3' GG guide RNAs corresponding to three different targets in *fox-1* did not improve the frequency of mutagenesis directed by Cas9. Experiments were conducted as those presented in Figure 2.

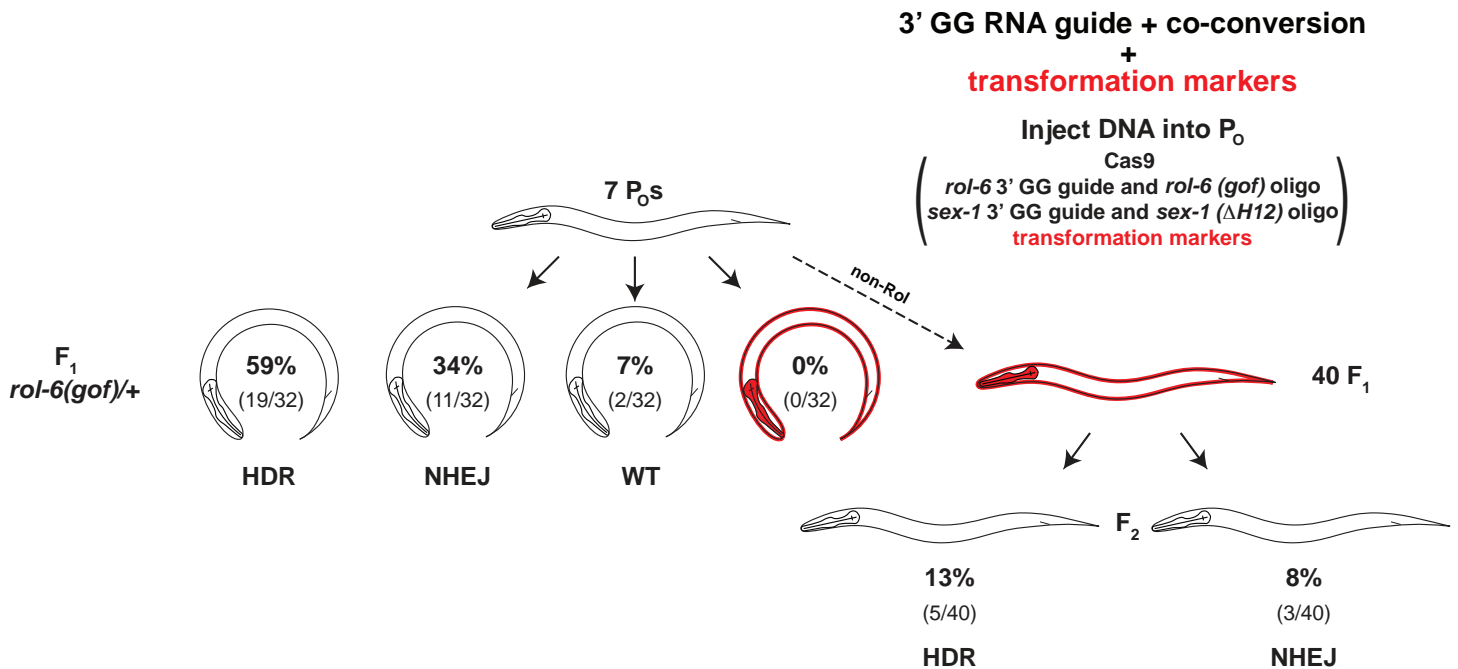

**Figure S2** Comparison of the co-CRISPR / co-conversion scheme plus 3' GG guide RNA with the transformation marker scheme plus the 3' GG guide RNA. From 7 of the 61 P<sub>0</sub> animals injected with Cas9, the *rol-6* and *sex-1* guides expressed from the R07E5.16 promoter, the *rol-6* and *sex-1* oligo repair templates, and the two DNA transformation markers *Pmyo-2::mCherry* and *Pmyo-3::mCherry*, we obtained Rol animals and red animals, with no overlap between the Rol and red animals. Of the Rol animals, 93% percent had a *sex-1* mutation: 59% from HDR repair and 34% from NHEJ repair. Of the red animals, 21% had a *sex-1* mutation: 13% from HDR repair and 8% from NHEJ repair. The reduced frequency of *sex-1* mutations among red animals (21% instead of 51%) in this experiment compared to that in Figure 2A is most likely due to the reduced concentration of *sex-1* guide RNA to make it equal that of the *rol-6* guide RNA. Thus, the easiest and most effective strategy to obtain mutations in loci of choice via HDR or NHEJ events is to combine our 3' GG guide RNA design with the co-CRISPR / co-conversion strategy.

**Table S1 Summary of current and published editing frequencies using 3' GG and non-GG guides**

**Our Guide Efficiencies**

**GG Guides**

| Target Gene       | Guide RNA | Protospacer Sequence (PAM) | sgRNA Bases 19,20 | Mutagenesis Rate (%) | Publication |
|-------------------|-----------|----------------------------|-------------------|----------------------|-------------|
| <i>lir-2</i>      | 3' GG     | GGCTGATTTTCGCAGTTCGG (GGG) | GG                | 72                   | This study  |
| <i>Y62E10A.17</i> | 3' GG     | CGCACCGATGCTCTCCGAGG (AGG) | GG                | 57                   | This study  |
| <i>sex-1</i>      | 3' GG (1) | GGATGAGAATCTGACAAAGG (TGG) | GG                | 54                   | This study  |
| <i>cpsf-2</i>     | 3' GG     | CACTTTCAATTTGATAATGG (AGG) | GG                | 52                   | This study  |
| <i>sex-1</i>      | 3' GG (2) | AACATTTCCACAACGAGAGG (AGG) | GG                | 51                   | This study  |
| <i>fox-1</i>      | 3' GG (1) | ATATGAGGGGAGTGAGGCGG (TGG) | GG                | 29                   | This study  |
| <i>fox-1</i>      | 3' GG (3) | ATTACAGTGAAGTACAGCGG (AGG) | GG                | 21                   | This study  |
| <i>fox-1</i>      | 3' GG (2) | AATATCGTTTACCAAAACGG (GGG) | GG                | 13                   | This study  |
| <i>xol-1</i>      | 3' GG     | AGCGATTTCTGGCGATTGGG (GGG) | GG                | 10                   | This study  |

median: 51

**Non-GG Guides**

|                   |                 |                             |    |    |            |
|-------------------|-----------------|-----------------------------|----|----|------------|
| <i>sex-1</i>      | 3' GG-shift (1) | AACGGATGAGAATCTGACAA (AGG)  | AA | 21 | This study |
| <i>fox-1</i>      | 3' GG-shift (1) | CATTTGATATGAGGGGAGTG (AGG)  | TG | 20 | This study |
| <i>Y62E10A.17</i> | 3' GG-shift     | ATACGCACCGATGCTCTCCG (AGG)  | CG | 14 | This study |
| <i>sex-1</i>      | 3' GG-shift (2) | TGGAACATTTCCACAACGAG (AGG)  | AG | 8  | This study |
| <i>lir-2</i>      | 3' GG-shift     | CTCGGCTGATTTTCGCAGTT (CGG)  | TT | 1  | This study |
| <i>cpsf-2</i>     | 3' GG-shift     | AAACACTTTCATTTGATAA (TGG)   | AA | 0  | This study |
| <i>fox-1</i>      | 3' GG-shift (2) | TTGAATATCGTTTACCAAAA (CGG)  | AA | 0  | This study |
| <i>fox-1</i>      | 3' GG-shift (3) | ACAATTACAGTGAAGTACAG (CGG)  | AG | 0  | This study |
| <i>xol-1</i>      | 3' GG-shift     | TCTAGCGATTTCTGGCGATT (GGG)  | TT | 0  | This study |
| <i>cpsf-2</i>     | 3' non-GG (1)   | GTGGTTGGGATGAGCGATT (CGG)   | TC | 0  | This study |
| <i>lir-2</i>      | 3' non-GG (1)   | AATCAGCCGAGATGTAAGTT (TGG)  | TT | 0  | This study |
| <i>lir-2</i>      | 3' non-GG (2)   | TTGACTCGTTCCATTTTCAGC (TGG) | GC | 0  | This study |
| <i>sex-1</i>      | 3' non-GG (1)   | AAACCTGCCTCCTCTCGTTG (TGG)  | TG | 0  | This study |

median: 0

**Published Guide Efficiencies**

**GG Guides**

| Target Gene   | Guide RNA | Protospacer Sequence (PAM) | sgRNA Bases 19,20 | Mutagenesis Rate (%) | Publication                  |
|---------------|-----------|----------------------------|-------------------|----------------------|------------------------------|
| <i>klp-12</i> |           | GATCCACAAGTTACAATTGG (TGG) | GG                | 80.3                 | Friedland <i>et al.</i> 2013 |
| <i>vet-2</i>  |           | GTTGGATCATAGGATACCGG (TGG) | GG                | 38                   | Kim <i>et al.</i> 2014       |

median: 59

**Non-GG Guides**

|                  |     |                              |    |      |                              |
|------------------|-----|------------------------------|----|------|------------------------------|
| <i>C35E7.6</i>   |     | GGGACCATAACCGAGTGATG (GGG)   | TG | 100  | Kim <i>et al.</i> 2014       |
| <i>lon-2</i>     |     | GGGAAACTATAACCCCTCACTG (TGG) | TG | 30   | Kim <i>et al.</i> 2014       |
| <i>pie-1</i>     | a   | GGCTCAGATTGACGAGGCGC (CGG)   | GC | 24   | Kim <i>et al.</i> 2014       |
| <i>lin-5</i>     |     | GGAGCTTACTGAGACTCTTC (GGG)   | TC | 20.8 | Waijers <i>et al.</i> 2013   |
| <i>avr-14</i>    | (2) | GATTGGAGAGTTAGACCACG (TGG)   | CG | 20   | Kim <i>et al.</i> 2014       |
| <i>Y61A9LA.1</i> |     | GGATGGATGTGTAGTCAATT (CGG)   | TT | 18.1 | Friedland <i>et al.</i> 2013 |
| <i>pie-1</i>     | b   | GCTGAGAGAAGAATCCATCG (GGG)   | CG | 15   | Kim <i>et al.</i> 2014       |
| <i>avr-14</i>    | (1) | GAATATTGAAAAGACTATGAT (TGG)  | AT | 10   | Kim <i>et al.</i> 2014       |
| <i>unc-4</i>     | (1) | GTTATCGTCATCCGGTGACG (TGG)   | CG | 10   | Kim <i>et al.</i> 2014       |
| <i>dpy-11</i>    |     | GCAAGGATCTTCAAAAAGCA (TGG)   | CA | 10   | Waijers <i>et al.</i> 2013   |
| <i>pie-1</i>     | c   | GGACAAGAGAGGGGGGTGAG (TGG)   | AG | 7.5  | Kim <i>et al.</i> 2014       |
| <i>unc-22</i>    | (2) | GAACCCGTTGCCGAATACAC (AGG)   | AC | 5    | Kim <i>et al.</i> 2014       |
| <i>pie-1</i>     | d   | GTTGAGTGACGCCATTTGCT (CGG)   | CT | 5    | Kim <i>et al.</i> 2014       |
| <i>unc-119</i>   |     | GTTATAGCCTGTTCCGGTTAC (CGG)  | AC | 4.9  | Waijers <i>et al.</i> 2013   |
| <i>unc-119</i>   |     | GAATTTTCTGAAATTAAGA (CGG)    | GA | 3.7  | Friedland <i>et al.</i> 2013 |
| <i>rol-1</i>     |     | GGAGGTTGACTCCAATACTA (AGG)   | TA | 1.4  | Waijers <i>et al.</i> 2013   |
| <i>dpy-13</i>    |     | GGACATTGACACTAAAATCA (AGG)   | CA | 0.5  | Friedland <i>et al.</i> 2013 |
| <i>dpy-11</i>    | (2) | GCAAGGATCTTCAAAAAGCA (CGG)   | CA | 0.4  | Kim <i>et al.</i> 2014       |
| <i>ben-1</i>     | (5) | GGGAGAAAGTGATTTGCAGT (TGG)   | GT | 0    | Kim <i>et al.</i> 2014       |
| <i>ben-1</i>     | (3) | GGATATCACTTCCCAGAACT (TGG)   | CT | 0    | Kim <i>et al.</i> 2014       |
| <i>bli-2</i>     | (2) | GATGGACGGGATGGTAGAGA (TGG)   | GA | 0    | Kim <i>et al.</i> 2014       |
| <i>bli-2</i>     | (1) | GGATTTGCTGCTACTGAATC (CGG)   | TC | 0    | Kim <i>et al.</i> 2014       |
| <i>dpy-5</i>     | (2) | GTCCGATTCCGGCGCTGCATG (CGG)  | TG | 0    | Kim <i>et al.</i> 2014       |
| <i>dpy-5</i>     | (3) | GGTTTCTGGAGCTCCGGCT (GGG)    | CT | 0    | Kim <i>et al.</i> 2014       |
| <i>dpy-11</i>    | (4) | GATGCTTGTAGTCTGGAATC (GGG)   | CT | 0    | Kim <i>et al.</i> 2014       |
| <i>unc-22</i>    | (9) | GCCTTTGCTTCGATTTTCTT (TGG)   | TT | 0    | Kim <i>et al.</i> 2014       |
| <i>unc-32</i>    | (1) | GATAGGAAGCATCAGATTGA (AGG)   | GA | 0    | Kim <i>et al.</i> 2014       |
| <i>unc-32</i>    | (2) | GTTGCTGAACTGGGAGAGCT (CGG)   | CT | 0    | Kim <i>et al.</i> 2014       |

median: 4.3

**Table S2 Comparison of observed versus predicted guide RNA editing efficiency using the Doench *et al.* 2014 algorithm**

**GG Guides**

| Target Gene       | Guide RNA | Protospacer Sequence (PAM)  | sgRNA Bases 19,20 | Mutagenesis Rate (%) | sgRNA Score (Doench <i>et al.</i> 2014) |
|-------------------|-----------|-----------------------------|-------------------|----------------------|-----------------------------------------|
| <i>lir-2</i>      | 3' GG     | GGCTGATTTTCGCAGTTCGG (GGG)  | GG                | 72                   | no value                                |
| <i>Y62E10A.17</i> | 3' GG     | CGCACCGATGCTCTCCGAGG (AGG)  | GG                | 57                   | 0.041                                   |
| <i>sex-1</i>      | 3' GG (1) | GGATGAGAATCTGACAAAGG (TGG)  | GG                | 54                   | 0.198                                   |
| <i>cpsf-2</i>     | 3' GG     | CACTTTC AATTTGATAATGG (AGG) | GG                | 52                   | 0.063                                   |
| <i>sex-1</i>      | 3' GG (2) | AACATTTCCACAACGAGAGG (AGG)  | GG                | 51                   | 0.439                                   |
| <i>fox-1</i>      | 3' GG (1) | ATATGAGGGGAGTGAGGCGG (TGG)  | GG                | 29                   | 0.178                                   |
| <i>fox-1</i>      | 3' GG (3) | ATTACAGTGAAGTACAGCGG (AGG)  | GG                | 21                   | 0.749                                   |
| <i>fox-1</i>      | 3' GG (2) | AATATCGTTTACAAAACGG (GGG)   | GG                | 13                   | 0.422                                   |
| <i>xol-1</i>      | 3' GG     | AGCGATTTCTGGCGATTGGG (GGG)  | GG                | 10                   | 0.277                                   |

**Non-GG Guides**

|                   |                 |                             |    |    |          |
|-------------------|-----------------|-----------------------------|----|----|----------|
| <i>sex-1</i>      | 3' GG-shift (1) | AACGGATGAGAATCTGACAA (AGG)  | AA | 21 | 0.282    |
| <i>fox-1</i>      | 3' GG-shift (1) | CATTTGATATGAGGGGAGTG (AGG)  | TG | 20 | 0.063    |
| <i>Y62E10A.17</i> | 3' GG-shift     | ATACGCACCGATGCTCTCCG (AGG)  | CG | 14 | 0.887    |
| <i>sex-1</i>      | 3' GG-shift (2) | TGGAACATTTCCACAACGAG (AGG)  | AG | 8  | 0.355    |
| <i>lir-2</i>      | 3' GG-shift     | CTCGGCTGATTTTCGCAGTT (CGG)  | TT | 1  | no value |
| <i>cpsf-2</i>     | 3' GG-shift     | AAACACTTTCAATTTGATAA (TGG)  | AA | 0  | 0.026    |
| <i>fox-1</i>      | 3' GG-shift (2) | TTGAATATCGTTTACCAAAA (CGG)  | AA | 0  | 0.106    |
| <i>fox-1</i>      | 3' GG-shift (3) | ACAATTACAGTGAAGTACAG (CGG)  | AG | 0  | 0.669    |
| <i>xol-1</i>      | 3' GG-shift     | TCTAGCGATTTCTGGCGATT (GGG)  | TT | 0  | 0.010    |
| <i>cpsf-2</i>     | 3' non-GG (1)   | GTGGTTGGGATGAGCGATTC (GGG)  | TC | 0  | 0.005    |
| <i>lir-2</i>      | 3' non-GG (1)   | AATCAGCCGAGATGTAAGTT (TGG)  | TT | 0  | 0.045    |
| <i>lir-2</i>      | 3' non-GG (2)   | TTGACTCGTTCCATTTTCAGC (TGG) | GC | 0  | 0.108    |
| <i>sex-1</i>      | 3' non-GG (1)   | AAACCTGCCTCCTCTCGTTG (TGG)  | TG | 0  | 0.156    |

This table provides a comparison of our observed editing frequencies using 3' GG and non-GG guides compared to the scores we derived using the algorithm from Doench *et al.* (2014) that predicts guide editing frequencies based on experiments in mammalian cells. See website: <http://www.broadinstitute.org/rnai/public/analysis-tools/sgRNA-design>. The presence of the 3' GG motif in the protospacer is a better predictor of editing outcome than the algorithm. A score of 1 by this algorithm indicates a highly efficient guide.
