# Supplementary material
Source: PubMed Central journal article supplement (PMC4391549)
Supplement: 823595d7205515916b6273650db5200f_genetics.115.175166-5.pdf [file 823595d7205515916b6273650db5200f_genetics.115.175166-5.pdf]

**Table S1 Summary of current and published editing frequencies using 3' GG and non-GG guides**

**Our Guide Efficiencies**

**GG Guides**

| Target Gene       | Guide RNA | Protospacer Sequence (PAM) | sgRNA Bases 19,20 | Mutagenesis Rate (%) | Publication |
|-------------------|-----------|----------------------------|-------------------|----------------------|-------------|
| <i>lir-2</i>      | 3' GG     | GGCTGATTTTCGCAGTTCGG (GGG) | GG                | 72                   | This study  |
| <i>Y62E10A.17</i> | 3' GG     | CGCACCGATGCTCTCCGAGG (AGG) | GG                | 57                   | This study  |
| <i>sex-1</i>      | 3' GG (1) | GGATGAGAATCTGACAAAGG (TGG) | GG                | 54                   | This study  |
| <i>cpsf-2</i>     | 3' GG     | CACTTTCAATTGATAATGG (AGG)  | GG                | 52                   | This study  |
| <i>sex-1</i>      | 3' GG (2) | AACATTTCCACAACGAGAGG (AGG) | GG                | 51                   | This study  |
| <i>fox-1</i>      | 3' GG (1) | ATATGAGGGGAGTGAGGCGG (TGG) | GG                | 29                   | This study  |
| <i>fox-1</i>      | 3' GG (3) | ATTACAGTGAAGTACAGCGG (AGG) | GG                | 21                   | This study  |
| <i>fox-1</i>      | 3' GG (2) | AATATCGTTTACCAAAACGG (GGG) | GG                | 13                   | This study  |
| <i>xol-1</i>      | 3' GG     | AGCGATTTCTGGCGATTGGG (GGG) | GG                | 10                   | This study  |

median: 51

**Non-GG Guides**

|                   |                 |                             |    |    |            |
|-------------------|-----------------|-----------------------------|----|----|------------|
| <i>sex-1</i>      | 3' GG-shift (1) | AACGGATGAGAATCTGACAA (AGG)  | AA | 21 | This study |
| <i>fox-1</i>      | 3' GG-shift (1) | CATTTGATATGAGGGGAGTG (AGG)  | TG | 20 | This study |
| <i>Y62E10A.17</i> | 3' GG-shift     | ATACGCACCGATGCTCTCCG (AGG)  | CG | 14 | This study |
| <i>sex-1</i>      | 3' GG-shift (2) | TGGAACATTTCCACAACGAG (AGG)  | AG | 8  | This study |
| <i>lir-2</i>      | 3' GG-shift     | CTCGGCTGATTTTCGCAGTT (CGG)  | TT | 1  | This study |
| <i>cpsf-2</i>     | 3' GG-shift     | AAACACTTTCAAATTTGATAA (TGG) | AA | 0  | This study |
| <i>fox-1</i>      | 3' GG-shift (2) | TTGAATATCGTTTACCAAAA (CGG)  | AA | 0  | This study |
| <i>fox-1</i>      | 3' GG-shift (3) | ACAATTACAGTGAAGTACAG (CGG)  | AG | 0  | This study |
| <i>xol-1</i>      | 3' GG-shift     | TCTAGCGATTTCTGGCGATT (GGG)  | TT | 0  | This study |
| <i>cpsf-2</i>     | 3' non-GG (1)   | GTGGTTGGGATGAGCGATTTC (GGG) | TC | 0  | This study |
| <i>lir-2</i>      | 3' non-GG (1)   | AATCAGCCGAGATGTAAGTT (TGG)  | TT | 0  | This study |
| <i>lir-2</i>      | 3' non-GG (2)   | TTGACTCGTTCCATTTTCAGC (TGG) | GC | 0  | This study |
| <i>sex-1</i>      | 3' non-GG (1)   | AAACCTGCCTCCTCTCGTTG (TGG)  | TG | 0  | This study |

median: 0

**Published Guide Efficiencies**

**GG Guides**

| Target Gene   | Guide RNA | Protospacer Sequence (PAM) | sgRNA Bases 19,20 | Mutagenesis Rate (%) | Publication                  |
|---------------|-----------|----------------------------|-------------------|----------------------|------------------------------|
| <i>klp-12</i> |           | GATCCACAAGTTACAATTGG (TGG) | GG                | 80.3                 | Friedland <i>et al.</i> 2013 |
| <i>vet-2</i>  |           | GTTGGATCATAGGATACCGG (TGG) | GG                | 38                   | Kim <i>et al.</i> 2014       |

median: 59

**Non-GG Guides**

|                  |     |                             |    |      |                              |
|------------------|-----|-----------------------------|----|------|------------------------------|
| <i>C35E7.6</i>   |     | GGGCACCATACCGAGTGATG (GGG)  | TG | 100  | Kim <i>et al.</i> 2014       |
| <i>lon-2</i>     |     | GGGAAACTATACCCCTCACTG (TGG) | TG | 30   | Kim <i>et al.</i> 2014       |
| <i>pie-1</i>     | a   | GGCTCAGATTGACGAGGCGC (CGG)  | GC | 24   | Kim <i>et al.</i> 2014       |
| <i>lin-5</i>     |     | GGAGCTTACTGAGACTCTTC (GGG)  | TC | 20.8 | Waijers <i>et al.</i> 2013   |
| <i>avr-14</i>    | (2) | GATTGGAGAGTTAGACCACG (TGG)  | CG | 20   | Kim <i>et al.</i> 2014       |
| <i>Y61A9LA.1</i> |     | GGATGGATGTGTAGTCAATT (CGG)  | TT | 18.1 | Friedland <i>et al.</i> 2013 |
| <i>pie-1</i>     | b   | GCCTGAGAGAAGAATCCATCG (GGG) | CG | 15   | Kim <i>et al.</i> 2014       |
| <i>avr-14</i>    | (1) | GAATATTGAAAAGACTATGAT (TGG) | AT | 10   | Kim <i>et al.</i> 2014       |
| <i>unc-4</i>     | (1) | GTTATCGTTCATCCGGTGACG (TGG) | CG | 10   | Kim <i>et al.</i> 2014       |
| <i>dpy-11</i>    |     | GCAAGGATCTTCAAAAAGCA (TGG)  | CA | 10   | Waijers <i>et al.</i> 2013   |
| <i>pie-1</i>     | c   | GGACAAAGAGAGGGGGTGAG (TGG)  | AG | 7.5  | Kim <i>et al.</i> 2014       |
| <i>unc-22</i>    | (2) | GAACCCGTTGCCGAATACAC (AGG)  | AC | 5    | Kim <i>et al.</i> 2014       |
| <i>pie-1</i>     | d   | GTTGAGTGCAGCCATTTGCT (CGG)  | CT | 5    | Kim <i>et al.</i> 2014       |
| <i>unc-119</i>   |     | GTTATAGCCTGTTCCGGTTAC (CGG) | AC | 4.9  | Waijers <i>et al.</i> 2013   |
| <i>unc-119</i>   |     | GAATTTTCTGAAATTAAAGA (CGG)  | GA | 3.7  | Friedland <i>et al.</i> 2013 |
| <i>rol-1</i>     |     | GGAGGTTGACTCCAATACTA (AGG)  | TA | 1.4  | Waijers <i>et al.</i> 2013   |
| <i>dpy-13</i>    |     | GGACATTGACACTAAAATCA (AGG)  | CA | 0.5  | Friedland <i>et al.</i> 2013 |
| <i>dpy-11</i>    | (2) | GCAAGGATCTTCAAAAAGCA (CGG)  | CA | 0.4  | Kim <i>et al.</i> 2014       |
| <i>ben-1</i>     | (5) | GGGAGAAAGTGATTTGCAGT (TGG)  | GT | 0    | Kim <i>et al.</i> 2014       |
| <i>ben-1</i>     | (3) | GGATATCACTTCCCAGAACT (TGG)  | CT | 0    | Kim <i>et al.</i> 2014       |
| <i>bli-2</i>     | (2) | GATGGACGGGATGGTAGAGA (TGG)  | GA | 0    | Kim <i>et al.</i> 2014       |
| <i>bli-2</i>     | (1) | GGATTTGCTGCTACTGAATC (CGG)  | TC | 0    | Kim <i>et al.</i> 2014       |
| <i>dpy-5</i>     | (2) | GTCCGATTCGGCGCTGCATG (CGG)  | TG | 0    | Kim <i>et al.</i> 2014       |
| <i>dpy-5</i>     | (3) | GGTTTCTGGAGCTCCGGCT (GGG)   | CT | 0    | Kim <i>et al.</i> 2014       |
| <i>dpy-11</i>    | (4) | GATGCTTGTAGTCTGGAATC (GGG)  | CT | 0    | Kim <i>et al.</i> 2014       |
| <i>unc-22</i>    | (9) | GCCTTTGCTTCGATTTTCTT (TGG)  | TT | 0    | Kim <i>et al.</i> 2014       |
| <i>unc-32</i>    | (1) | GATAGGAAGCATCAGATTGA (AGG)  | GA | 0    | Kim <i>et al.</i> 2014       |
| <i>unc-32</i>    | (2) | GTTGCTGAACFGGAGAGCT (CGG)   | CT | 0    | Kim <i>et al.</i> 2014       |

median: 4.3
