# Supplementary material
Source: PubMed Central journal article supplement (PMC4391549)
Supplement: b508a46c1686227860a6eaf44b72eb77_genetics.115.175166-3.pdf [file b508a46c1686227860a6eaf44b72eb77_genetics.115.175166-3.pdf]

**Table S2 Comparison of observed versus predicted guide RNA editing efficiency using the Doench *et al.* 2014 algorithm**

**GG Guides**

| Target Gene       | Guide RNA | Protospacer Sequence (PAM) | sgRNA Bases 19,20 | Mutagenesis Rate (%) | sgRNA Score (Doench <i>et al.</i> 2014) |
|-------------------|-----------|----------------------------|-------------------|----------------------|-----------------------------------------|
| <i>lir-2</i>      | 3' GG     | GGCTGATTTTCGCAGTTCGG (GGG) | GG                | 72                   | no value                                |
| <i>Y62E10A.17</i> | 3' GG     | CGCACCGATGCTCTCCGAGG (AGG) | GG                | 57                   | 0.041                                   |
| <i>sex-1</i>      | 3' GG (1) | GGATGAGAATCTGACAAAGG (TGG) | GG                | 54                   | 0.198                                   |
| <i>cpsf-2</i>     | 3' GG     | CACTTCAATTTGATAATGG (AGG)  | GG                | 52                   | 0.063                                   |
| <i>sex-1</i>      | 3' GG (2) | AACATTTCCACAACGAGAGG (AGG) | GG                | 51                   | 0.439                                   |
| <i>fox-1</i>      | 3' GG (1) | ATATGAGGGGAGTGAGGCGG (TGG) | GG                | 29                   | 0.178                                   |
| <i>fox-1</i>      | 3' GG (3) | ATTACAGTGAAGTACAGCGG (AGG) | GG                | 21                   | 0.749                                   |
| <i>fox-1</i>      | 3' GG (2) | AATATCGTTTACCAAAACGG (GGG) | GG                | 13                   | 0.422                                   |
| <i>xol-1</i>      | 3' GG     | AGCGATTTCTGGCGATTGGG (GGG) | GG                | 10                   | 0.277                                   |

**Non-GG Guides**

|                   |                 |                            |    |    |          |
|-------------------|-----------------|----------------------------|----|----|----------|
| <i>sex-1</i>      | 3' GG-shift (1) | AACGGATGAGAATCTGACAA (AGG) | AA | 21 | 0.282    |
| <i>fox-1</i>      | 3' GG-shift (1) | CATTTGATATGAGGGGAGTG (AGG) | TG | 20 | 0.063    |
| <i>Y62E10A.17</i> | 3' GG-shift     | ATACGCACCGATGCTCTCCG (AGG) | CG | 14 | 0.887    |
| <i>sex-1</i>      | 3' GG-shift (2) | TGGAACATTTCCACAACGAG (AGG) | AG | 8  | 0.355    |
| <i>lir-2</i>      | 3' GG-shift     | CTCGGCTGATTTTCGCAGTT (CGG) | TT | 1  | no value |
| <i>cpsf-2</i>     | 3' GG-shift     | AAACACTTTCAATTTGATAA (TGG) | AA | 0  | 0.026    |
| <i>fox-1</i>      | 3' GG-shift (2) | TTGAATATCGTTTACCAAAA (CGG) | AA | 0  | 0.106    |
| <i>fox-1</i>      | 3' GG-shift (3) | ACAATTACAGTGAAGTACAG (CGG) | AG | 0  | 0.669    |
| <i>xol-1</i>      | 3' GG-shift     | TCTAGCGATTTCTGGCGATT (GGG) | TT | 0  | 0.010    |
| <i>cpsf-2</i>     | 3' non-GG (1)   | GTGGTTGGGATGAGCGATTC (GGG) | TC | 0  | 0.005    |
| <i>lir-2</i>      | 3' non-GG (1)   | AATCAGCCGAGATGTAAGTT (TGG) | TT | 0  | 0.045    |
| <i>lir-2</i>      | 3' non-GG (2)   | TTGACTCGTTCATTTCAGC (TGG)  | GC | 0  | 0.108    |
| <i>sex-1</i>      | 3' non-GG (1)   | AAACCTGCCTCCTCTCGTTG (TGG) | TG | 0  | 0.156    |

This table provides a comparison of our observed editing frequencies using 3' GG and non-GG guides compared to the scores we derived using the algorithm from Doench *et al.* (2014) that predicts guide editing frequencies based on experiments in mammalian cells. See website: <http://www.broadinstitute.org/rnai/public/analysis-tools/sgRNA-design>. The presence of the 3' GG motif in the protospacer is a better predictor of editing outcome than the algorithm. A score of 1 by this algorithm indicates a highly efficient guide.
